# Supplementary material
Source: PubMed Central journal article supplement (PMC8590478)
Supplement: mmc1.pdf [file mmc1.pdf]

# Demographics

---

Study ID

---

---

Age (years)

---

---

Ethnicity

Hispanic or Latino    NOT Hispanic or Latino    Unknown / Not Reported

---

Race

- American Indian/Alaska Native  
 Asian  
 Native Hawaiian or Other Pacific Islander  
 Black or African American  
 White  
 More Than One Race  
 Unknown / Not Reported

---

Gender

- Female  
 Male

---

Height (cm)

---

---

Weight (kilograms)

---

---

BMI

---

---

Smoking HX

- Yes  
 No

---

Current Smoker

- Yes  
 No

---

Resides in nursing home

- Yes  
 No

---

Resides in long term care facility

- Yes  
 No

---

Zip code

---

---

Comments

---
