# Supplementary material
Source: PubMed Central journal article supplement (PMC8590478)
Supplement: mmc2.pdf [file mmc2.pdf]

# Symptoms

Study ID

\_\_\_\_\_

Date of sx onset

\_\_\_\_\_

Symptom (s) at Onset

- Fever > 100
- Chills
- Headache
- Cough
- Sputum production
- SOB
- DOE
- sore throat
- rhinorrhea
- diarrhea
- anosmia
- conjunctivitis
- myalgias
- nausea
- vomiting
- fatigue

Symptom NOS

\_\_\_\_\_

In person office visit?

- Yes
- No

Date of in person office visit

\_\_\_\_\_

Telemed visit?

- Yes
- No

Date of telemed visit

\_\_\_\_\_

Date swab was done

\_\_\_\_\_

Date COVID + result

\_\_\_\_\_

---

Medications Used

- Albuterol
- Ipratropium
- Duoneb
- Inhaled corticosteroid
- Azithromycin
- Tylenol
- NSAID
- Promethazine
- Honey
- Guaifenesin
- Dextromethorphan
- Benzonatate
- Codeine syrup
- Flonase
- Lozenge
- Mometasone
- Afrin
- Pseudoephedrine
- Phenylephrine
- Diphenhydramine
- Doxylamine
- Cetirizine
- Loratidine
- Fexofenadine
- Benzodiazepine

---

Date of second encounter

---

---

Symptom (s) at second encounter

- Fever > 100
- Chills
- Headache
- Cough
- Sputum production
- SOB
- DOE
- sore throat
- rhinorrhea
- diarrhea
- anosmia
- conjunctivitis
- myalgias
- nausea
- vomiting
- fatigue

---

Symptoms NOS 2nd encounter

---

---

Date of third encounter

---

---

Symptom (s) at 3rd encounter

- Fever > 100
- Chills
- Headache
- Cough
- Sputum production
- SOB
- DOE
- sore throat
- rhinorrhea
- diarrhea
- anosmia
- conjunctivitis
- myalgias
- nausea
- vomiting
- fatigue

---

Symptoms NOS 3rd encounter

---

---

Date of fourth encounter

---

---

Symptom (s) at 4th encounter

- Fever > 100
- Chills
- Headache
- Cough
- Sputum production
- SOB
- DOE
- sore throat
- rhinorrhea
- diarrhea
- anosmia
- conjunctivitis
- myalgias
- nausea
- vomiting
- fatigue

---

Symptoms NOS 4th encounter

---

---

Date of 5th encounter

---

---

Symptom (s) at 5th encounter

- Fever > 100
- Chills
- Headache
- Cough
- Sputum production
- SOB
- DOE
- sore throat
- rhinorrhea
- diarrhea
- anosmia
- conjunctivitis
- myalgias
- nausea
- vomiting
- fatigue

---

Symptoms NOS 5th encounter

---

---

Date of Symptom Resolution

---

---

ER Visit

- Yes
- No

---

Date of ER visit

---

---

Symptom (s) at ER visit

- Fever > 100
- Chills
- Headache
- Cough
- Sputum production
- SOB
- DOE
- sore throat
- rhinorrhea
- diarrhea
- anosmia
- conjunctivitis
- myalgias
- nausea
- vomiting
- fatigue

---

Symptoms NOS ER

---

---

Imaging Done Outpatient?

- Yes
- No

---

Type of Imaging

- CT
- CXR

---

Result of Imaging

---
